# Supplementary material for: Comparative analysis of machine learning approaches for predicting respiratory virus infection and symptom severity
Source: PeerJ journal article supplement (doi:10.7717/peerj.15552), 2023-06-30
Supplement: supplementary1.pdf [file supplementary1.pdf]

Table 1. Optimized hyperparameters and value ranges for regression algorithms

|                           |                                 |                                             |
|---------------------------|---------------------------------|---------------------------------------------|
| Bayesian Ridge            | Alpha 1                         | (0.0000001 - 1)                             |
|                           | Alpha 2 (Inverse Scale Alpha)   | (0.0000001 - 1)                             |
|                           | Lambda 1                        | (0.0000001 - 1)                             |
|                           | Lambda 2 (Inverse Scale Lambda) | (0.0000001 - 1)                             |
| DecisionTreeRegressor     | Splitter                        | [Best, Random]                              |
| ElasticNet                | Alpha                           | (0.0001 - 2)                                |
|                           | L1 Ratio                        | (0.05 - 1)                                  |
| GradientBoostingRegressor | Learning Rate                   | (0.01 - 1)                                  |
|                           | Number of estimators            | (50 - 1000)                                 |
|                           | Subsample                       | (0.001 - 1)                                 |
| KNeighborsRegressor       | Number of estimators            | (2 - Number of Samples)                     |
|                           | Weights                         | [Uniform, Distance]                         |
|                           | Algorithm                       | [Ball Tree, KD Tree, Brute]                 |
|                           | Leaf Size                       | (10 - 100)                                  |
|                           | Power                           | (1 - 3)                                     |
| Lasso                     | Alpha                           | (0.0001 - 2)                                |
|                           | Selection                       | [cyclic, random]                            |
| LinearSVR                 | Epsilon                         | (0 - 1)                                     |
|                           | Regularization (C)              | (0.00001 - 1000)                            |
| RandomForestRegressor     | Number of estimators            | (50 - 1000)                                 |
| Ridge                     | Alpha                           | (0.0000001 - 1)                             |
|                           | Solver                          | [svd, cholesky, lsqr, sparse cg, sag, saga] |
| XGBRegressor              | Booster                         | [GBTree, GBLinear, Dart]                    |
|                           | Learning Rate (eta)             | (0.001 - 1)                                 |
|                           | Gamma                           | (0 - 100)                                   |
|                           | Max Depth                       | (2 - 20)                                    |
|                           | Subsample                       | (0.0001 - 1)                                |
|                           | Lambda                          | (0.01 - 5)                                  |
|                           | Alpha                           | (0.01 - 5)                                  |

Table 2. Optimized hyperparameters and value ranges for classification algorithms

|                         |                      |                                     |
|-------------------------|----------------------|-------------------------------------|
| Logistic Regression     | Regularization (C)   | (0.0001 - 4000)                     |
|                         | Solver               | [LibLinear, LBFGS, Newton-cg, Saga] |
| Support Vector Machines | Regularization (C)   | (0.0001 - 4000)                     |
|                         | Kernel               | [Linear, Poly, RBF]                 |
|                         | Gamma                | (0.00001 - 10)                      |
| Random Forest           | Number of Estimators | (2 - 1000)                          |
|                         | Split Criteria       | [Gini, Entropy]                     |
|                         | Min Split Samples    | (1 - 32)                            |
| k-Nearest Neighbors     | Number of Neighbors  | (2 - Number of Samples)             |
|                         | Algorithm            | [Auto, Ball Tree, KD Tree, Brute]   |
| XGBoost                 | Booster              | [GBTree, GBLinear]                  |
|                         | Number of Estimators | (2 - 1000)                          |
|                         | Max Depth            | (2 - 512)                           |
|                         | Learning Rate (eta)  | (0.0001 - 10)                       |
|                         | Gamma                | (0 - 100)                           |
|                         | Alpha                | (0 - 32)                            |
| Lambda                  | (0 - 32)             |                                     |
