# Supplementary material for: Comparative analysis of machine learning approaches for predicting respiratory virus infection and symptom severity
Source: PeerJ journal article supplement (doi:10.7717/peerj.15552), 2023-06-30
Supplement: supplementary2.pdf [file supplementary2.pdf]

Tablo 1. Z-TEST Significance comparison between our best results and the DREAM Challenge results.

| <b>Z-TEST</b>  | <b>SC1 T0<br/>(ReliefF*)</b> | <b>SC1 T24<br/>(Fisher Score*)</b> | <b>SC2 T0<br/>(AF*)</b> | <b>SC2 T24<br/>(AF*)</b> | <b>SC3 T0<br/>(F Statis.)</b> | <b>SC3 T24<br/>(F Statis.*)</b> |
|----------------|------------------------------|------------------------------------|-------------------------|--------------------------|-------------------------------|---------------------------------|
| <b>Z-Score</b> | 0.1244                       | 0.7121                             | 0.6207                  | 1.5254                   | 0.4482                        | 1.1934                          |
| <b>P value</b> | 0.4522                       | 0.2388                             | 0.2676                  | 0.0630                   | 0.3263                        | 0.1170                          |
