# Supplementary material for: Comparative analysis of machine learning approaches for predicting respiratory virus infection and symptom severity
Source: PeerJ journal article supplement (doi:10.7717/peerj.15552), 2023-06-30
Supplement: supplementary3.pdf [file supplementary3.pdf]

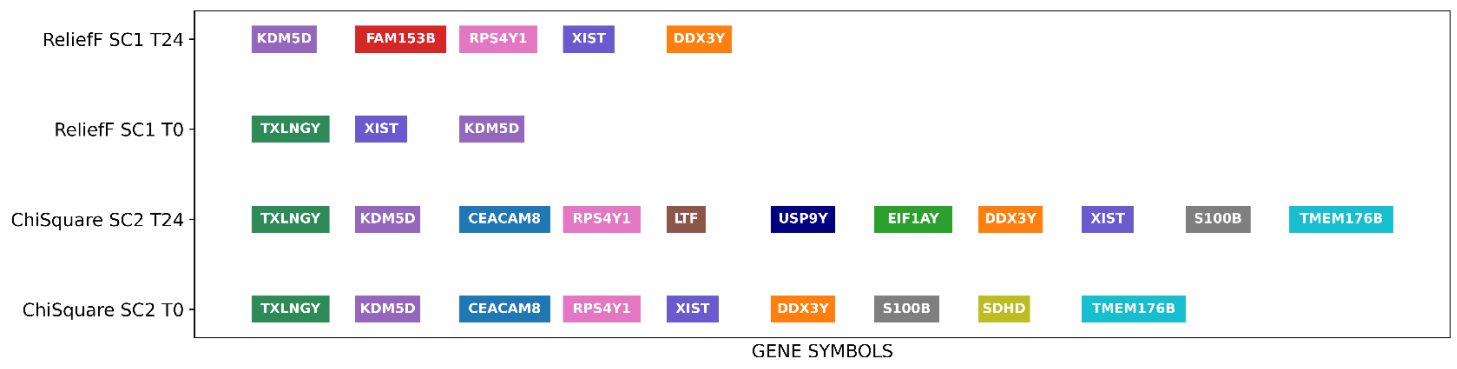

Figure 1 . Genes commonly selected for different experiments
